# Supplementary material for: Selective and marked decrease of complement receptor C5aR2 in human thoracic aortic aneurysms: a dysregulation with potential inflammatory effects
Source: PubMed Central journal article supplement — Open Heart. 2019 Nov 10;6(2):e001098. doi: 10.1136/openhrt-2019-001098 (PMC6861114; doi:10.1136/openhrt-2019-001098), 2019-11-10
Supplement: openhrt-2019-001098supp001.pdf [file openhrt-2019-001098supp001.pdf]

**SUPPLEMENTAL MATERIAL****3 Tables****Supplementary Table S1**

| <b>Antibody</b>                              | <b>Target</b>             | <b>Source</b>     | <b>Manufacturer</b> | <b>Specification</b> | <b>Dilution</b>         |
|----------------------------------------------|---------------------------|-------------------|---------------------|----------------------|-------------------------|
| Smooth muscle $\alpha$ -actin (IHC)          | Smooth muscle cells       | Monoclonal mouse  | DAKO                | Isotype IgG2Ak       | 1:200                   |
| CD68 (IHC)                                   | Macrophage                | Monoclonal mouse  | DAKO                | M0876                | 1:200                   |
| CD3 (IHC)                                    | Pan T cell                | Polyclonal rabbit | DAKO                | A0452                | 1:50                    |
| C5aR2 (both IHC and fluorescence)            | Complement receptor C5aR2 | Polyclonal rabbit | Abcam               | AB77982              | 1:50 (IHC)<br>1:20 (IF) |
| CD3 (fluorescence)                           | Pan T cell                | Monoclonal mouse  | Abcam               | AB699                | 1:50                    |
| smooth muscle $\alpha$ -actin (fluorescence) | Smooth muscle cells       | Rabbit polyclonal | Abcam               | AB5694               | 1:200                   |
| Mac-2 (fluorescence)                         | Macrophage                | Monoclonal rat    | Cedarlane           | Clone M3/38          | 1:600                   |

**Supplementary Table S2**

| <b>Secondary antibodies</b>        |                                        | <b>Manufacturer</b> | <b>Catalog number</b> |
|------------------------------------|----------------------------------------|---------------------|-----------------------|
| Anti-rabbit                        | CD3, C5aR2                             | ImmPRESS™           | MP-7401               |
| Anti-mouse                         | Smooth muscle $\alpha$ -actin,<br>CD68 | ImmPRESS™           | MP-7402               |
| Goat anti-rabbit<br>(fluorescence) | C5aR2                                  | Invitrogen          | A11008                |

**Supplementary Table S3**

| <b>Primers used for real-time RT-PCR</b> |                   |
|------------------------------------------|-------------------|
| C5aR2                                    | ID: Hs01933768_s1 |
| C5aR1                                    | ID: Hs00704891_s1 |
| C3aR1                                    | ID: Hs00269693_s1 |
| EIF2 $\beta$ 1                           | ID: Hs00426752_m1 |
